# Supplementary material for: Unlocking the Potential of N-Doped SnO2 for Sustainable Photocatalytic Degradation of Carcinogenic Dyes
Source: MDPI journal article supplement (doi:10.3390/separations10060322), 2023-05-23
Supplement: s1 [file s1]

## Supporting Information (SI)

# Unlocking the Potential of N-Doped SnO<sub>2</sub> for Sustainable Photocatalytic Degradation of Carcinogenic Dyes

Bhawna<sup>1</sup>, Ritika Sharma<sup>2</sup>, Sanjeev Kumar<sup>1</sup>, Ravinder Kumar<sup>3</sup>, Prasanta Kumar Sahu<sup>4</sup>, Vandana Kumari<sup>5</sup>, Ajay Kumar Mishra<sup>6,7,8,\*</sup> and Vinod Kumar<sup>9,\*</sup>

## Tables and Captions

**Table S1:** Calculation of parameters of N:SnO<sub>2</sub> nanoparticles.

| Phase            | Space Group                             | Cell Parameters (Å) |       |       | Angles (°) |         |          |
|------------------|-----------------------------------------|---------------------|-------|-------|------------|---------|----------|
|                  |                                         | a                   | b     | c     | $\alpha$   | $\beta$ | $\gamma$ |
| SnO <sub>2</sub> | Tetragonal<br><i>P4<sub>2</sub>/mnm</i> | 4.738               | 4.738 | 3.187 | 90         | 90      | 90       |

## Figures and Captions

Figure SI

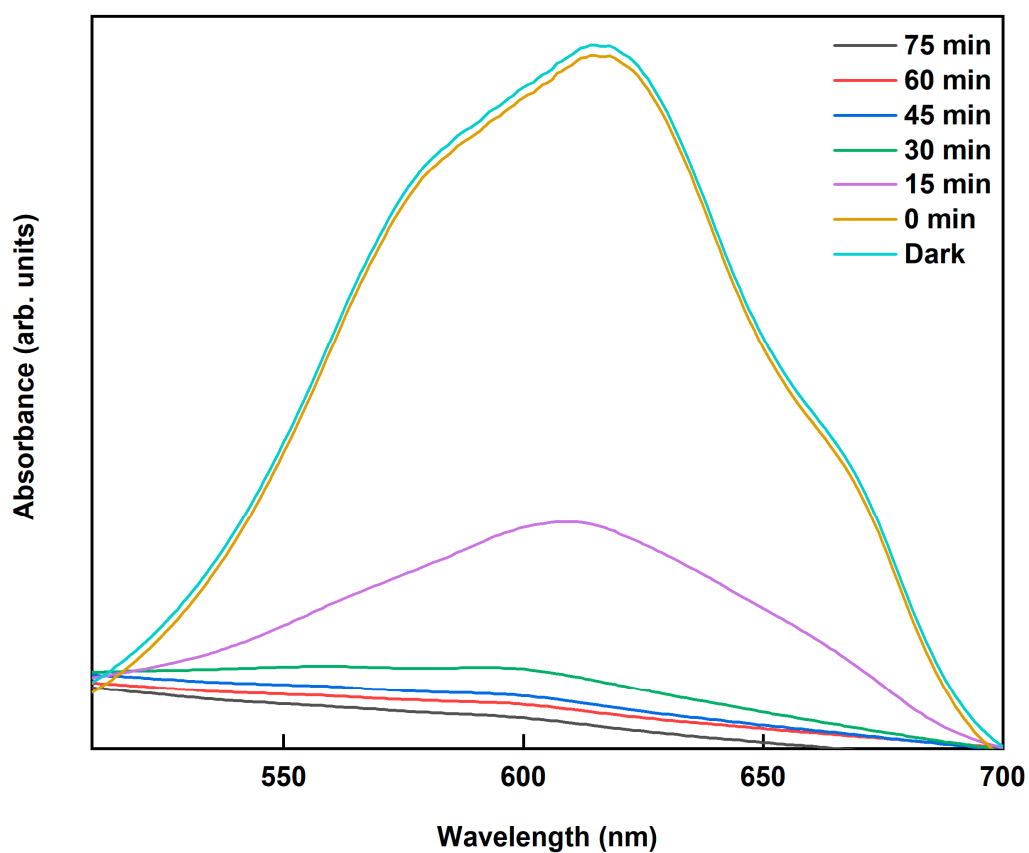

**Figure S1:** The temporal absorption spectrum changes of methylene blue (MB) aqueous solution in the presence of N:SnO<sub>2</sub> NPs under UV light irradiation.

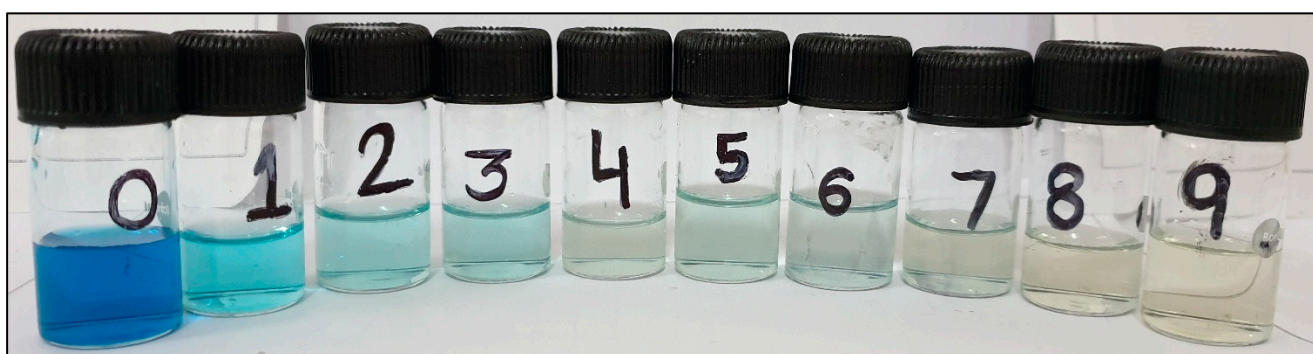

**Figure S2:** Color disappearance of MB aqueous solution in the presence of N:SnO<sub>2</sub> NPs under UV light irradiation.

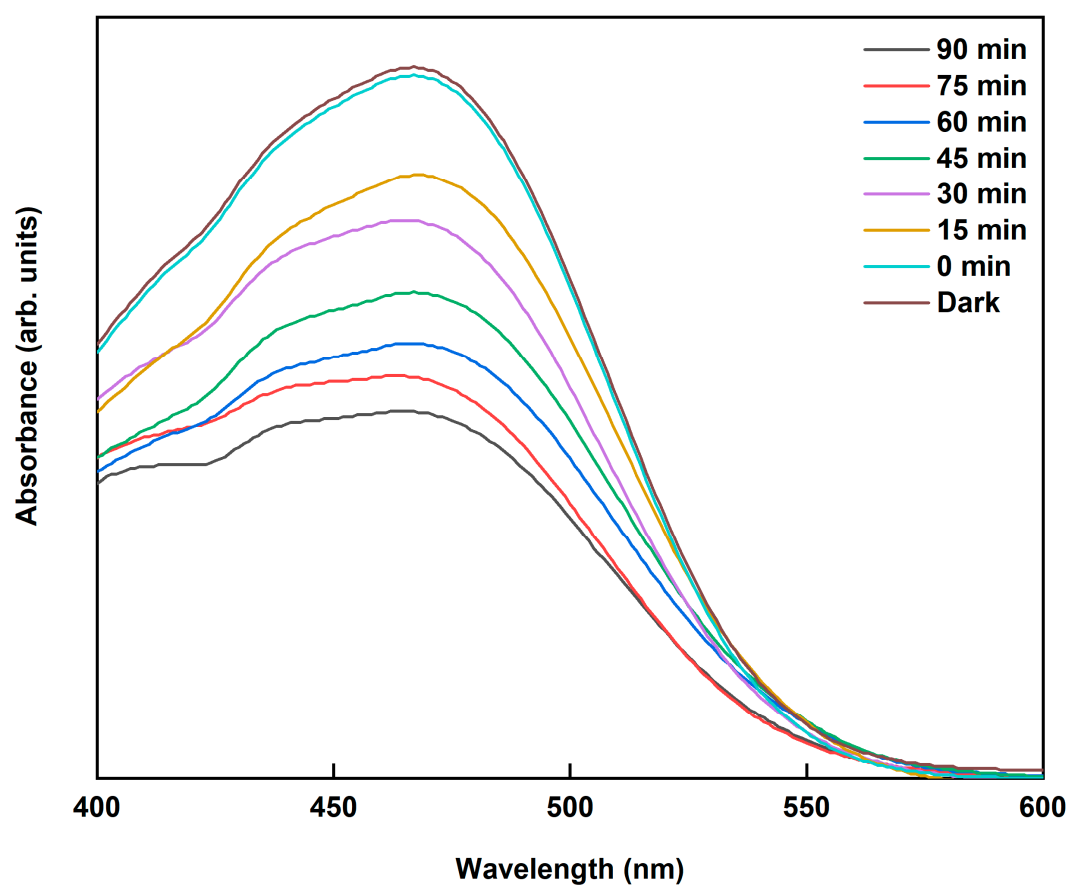

**Figure S3:** The temporal absorption spectrum changes of methyl orange (MO) aqueous solution in the presence of N:SnO<sub>2</sub> NPs under UV light irradiation.

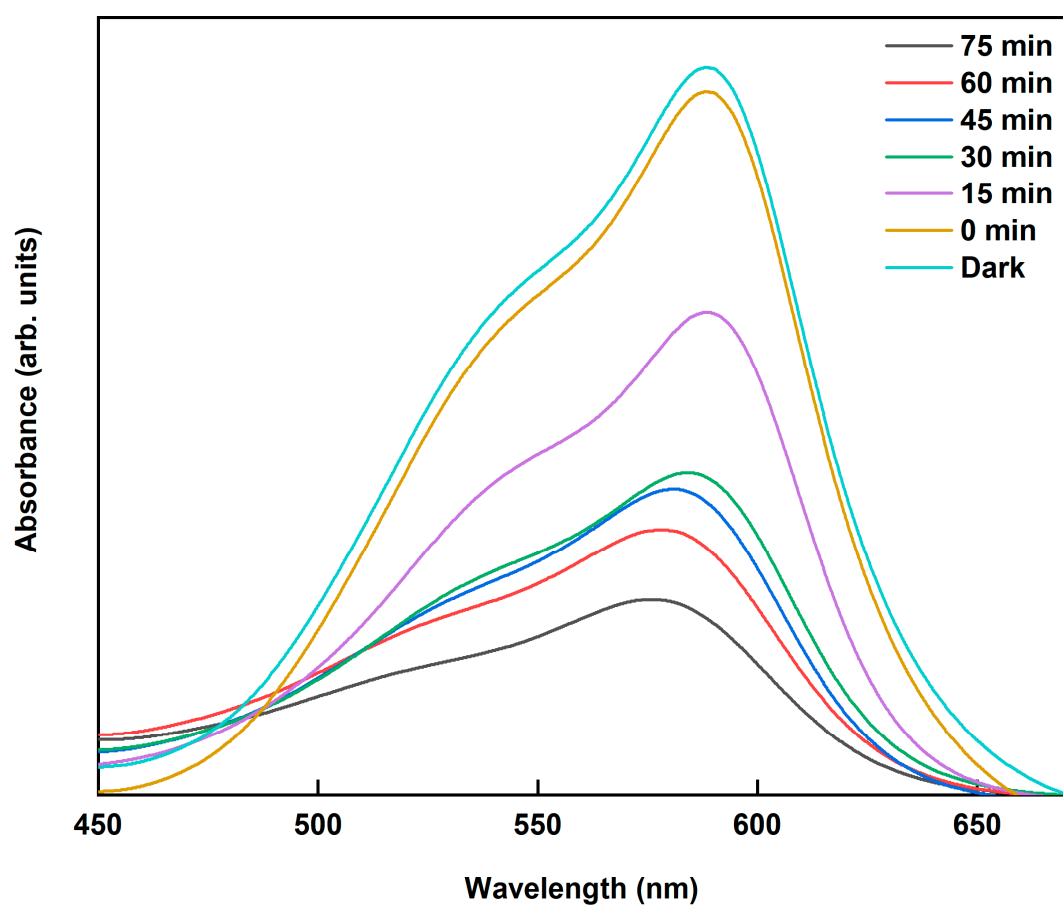

**Figure S4:** The temporal absorption spectrum changes of crystal violet (CV) aqueous solution in the presence of N:SnO<sub>2</sub> NPs under UV light irradiation.

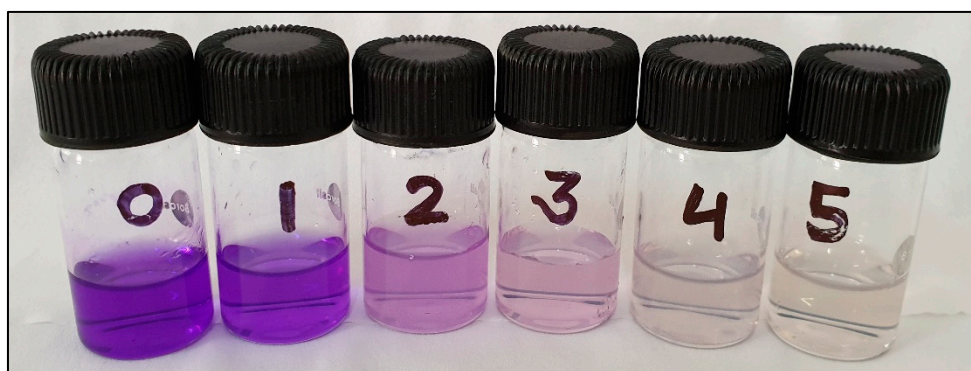

**Figure S5:** Color disappearance of CV aqueous solution in the presence of N:SnO<sub>2</sub> NPs under UV light irradiation.

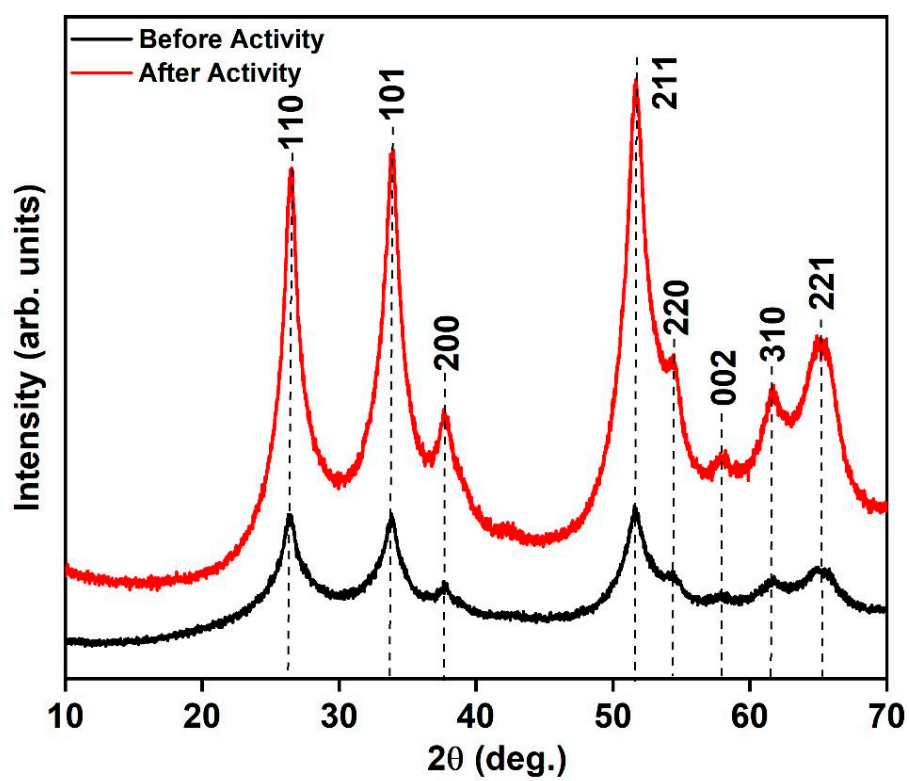

**Figure S6:** Comparative PXRD pattern of N:SnO<sub>2</sub> nanoparticles: before (black) and after (red) catalysis.
